# Supplementary material for: Inhibition of miR-331-3p and miR-9-5p ameliorates Alzheimer's disease by enhancing autophagy
Source: Theranostics. 2021 Jan 1;11(5):2395–409. doi: 10.7150/thno.47408 (PMC7797673; doi:10.7150/thno.47408)
Supplement: Supplementary file 1 — Supplementary figures. [file thnov11p2395s1.pdf]

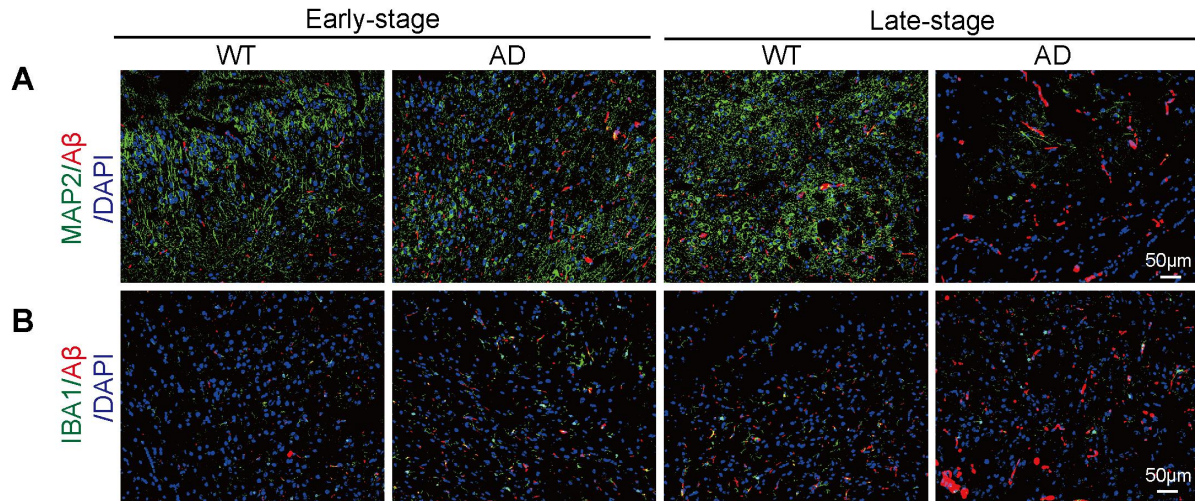

**Figure S1. Representative of the pathological changes at early and late stages of AD.**

**(A-B)** Double immunofluorescent staining of Aβ (red) and MAP2 (green) (A), Aβ (red) and IBA1 (green) (B) in brain tissues from WT or AD mice at early-stage or late-stage in high magnitude. Nuclei stained with DAPI were shown in blue. Scale bar, 50 μm.

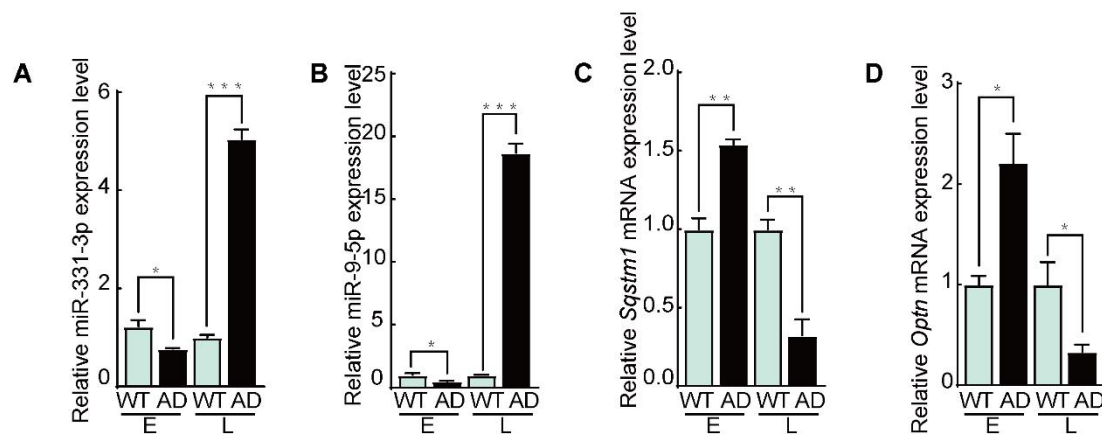

**Figure S2. MiR-331-3p and miR-9-5p were dynamic-changing in the brain during the progression of AD.**

**(A-B)** The miR-331-3p and miR-9-5p expression levels in the brain tissues from WT or AD mice at early-stage or late-stage. n = 3 per group. **(C-D)** The qRT-PCR analysis of *Sqstm1* and *Optn* in

the brain tissues from WT or AD mice at early-stage or late-stage.  $n = 3$  per group. For A-D: all data are presented as mean  $\pm$  sd. \*  $P < 0.05$ , \*\*  $P < 0.01$ , \*\*\*  $P < 0.001$  by unpaired t-test.

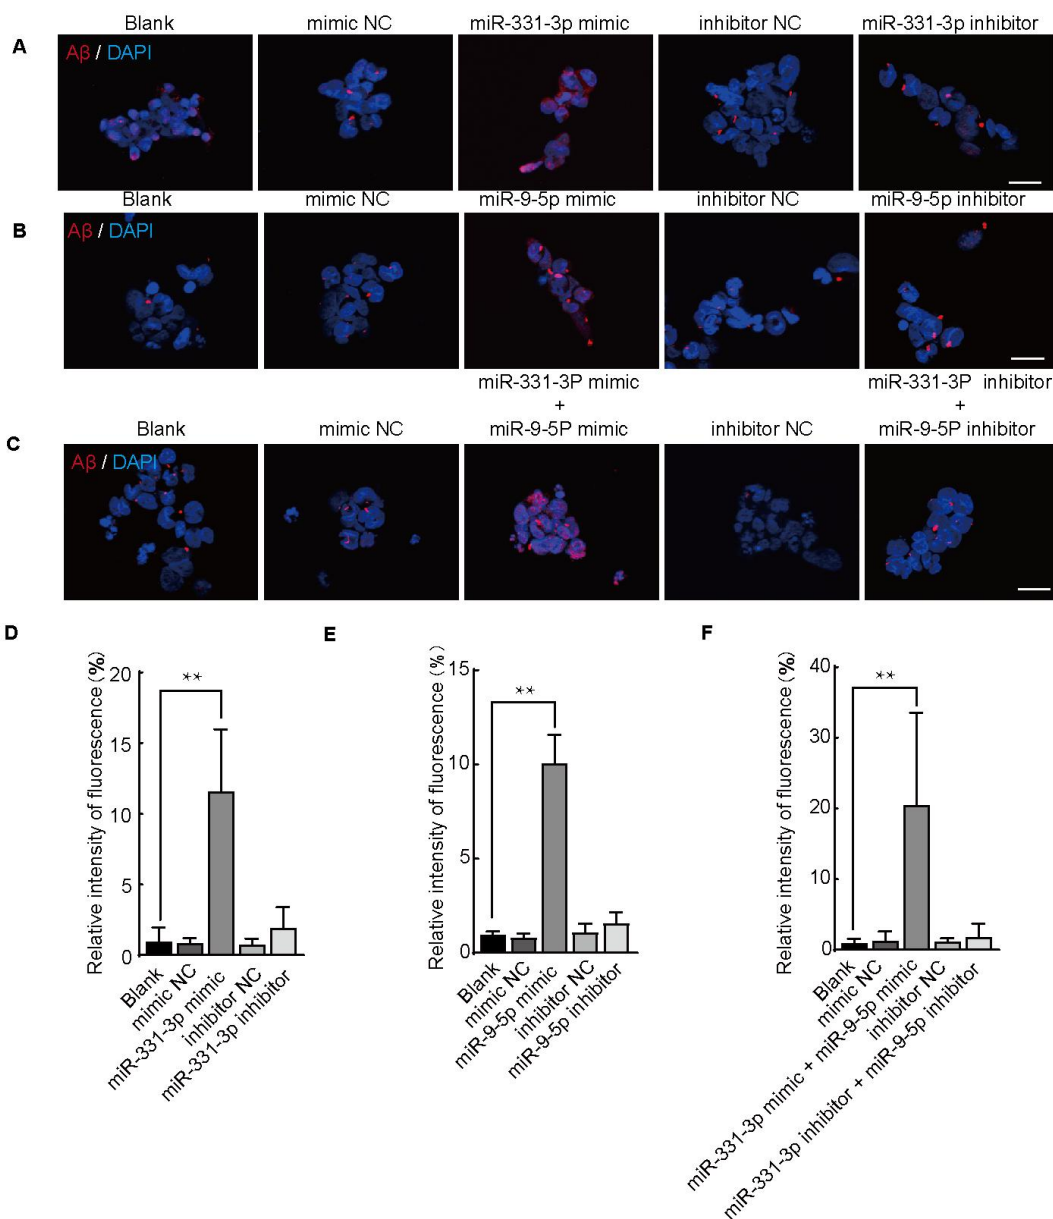

**Figure S3. MiR-331-3p and miR-9-5p impeded A $\beta$  elimination in differentiated SH-SY5Y.**

(A-C) Representative images of immunofluorescent staining of A $\beta$  (red) in differentiated SH-SY5Y cells treated with indicated small RNAs. Scale bar = 20  $\mu$ m. (D-F) Quantification of

relative intensity of fluorescence for panel A-C.  $n = 5$  *per* group. For D-F: all data are presented as mean  $\pm$  sd. \*\*  $P < 0.01$  by one-way ANOVA with Dunettee's post hoc test.

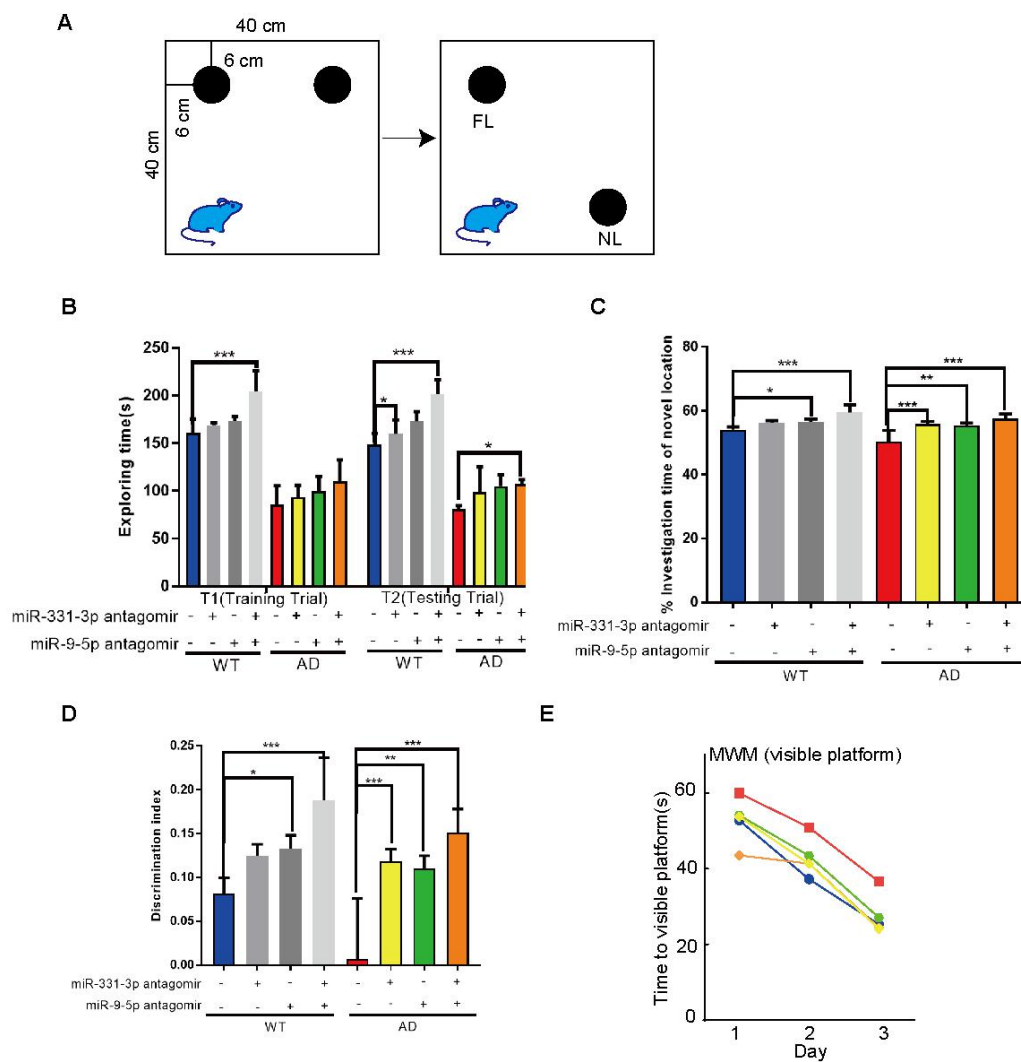

**Figure S4. MiR-331-3p and miR-9-5p antagonists ameliorated the memory and cognitive decline of AD mice.**

**(A)** Schematic representation of object location test. FL, familiar location; NL, new location.

**(B-D)** The exploring time (B), % investigation time of novel location (C) and discrimination

index (D) were analyzed by object location test.  $n = 5$  *per* group. **(E)** Time to the visible platform

were measured by the MWM test. For B-D: all data are presented as mean  $\pm$  sd. \*  $P < 0.05$ , \*\*  $P < 0.01$ , \*\*\*  $P < 0.001$  by one-way ANOVA with Dunettee's post hoc test.

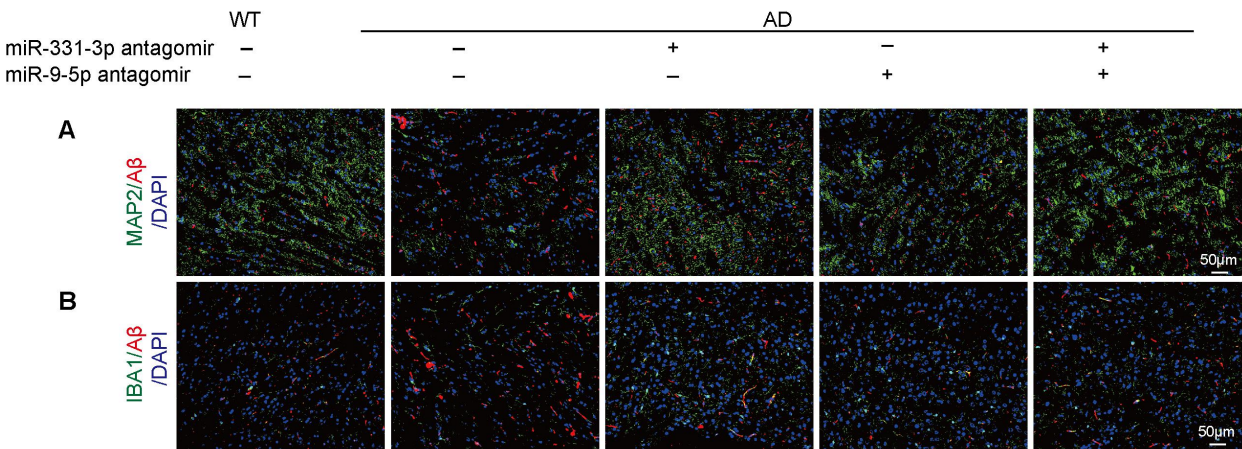

**Figure S5. MiR-331-3p or miR-9-5p antagomirs ameliorate the pathological conditions of AD mice.**

**(A-B)** Double immunofluorescent staining of A $\beta$  (red) and MAP2 (green) (A), A $\beta$  (red) and IBA1 (green) (B) in brain tissues after stereotactic injection of indicated antagomirs. Nuclei stained with DAPI were shown in blue. Scale bar, 50  $\mu$ m.
